# Supplementary material for: Poslovni (konjukturni) ciklusi i njihove politike - osvrt na Hrvatsku i Europsku uniju
Source: Royal Society of Chemistry journal article supplement (doi:10.1039/d3dt03179a), 2014-01-01
Supplement: d3dt03179a1.pdf [file d3dt03179a1.pdf]

**Enhancing the Zircon yield through the addition of calcium phosphates in ZrO<sub>2</sub>-  
SiO<sub>2</sub> binary system. Synthesis, structural, morphological, mechanical and in vitro  
evaluation**

M. Ezhilan<sup>a</sup>, G. Poornima<sup>a</sup>, Somlee Gupta<sup>b</sup>, Arunkumar Dhayalan<sup>b</sup> and S. Kannan<sup>a\*</sup>

*<sup>a</sup>Centre for Nanoscience and Technology,  
Pondicherry University, Puducherry-605 014, INDIA*

*<sup>b</sup>Department of Biotechnology,  
Pondicherry University, Puducherry-605 014, INDIA*

Supporting information 1\*

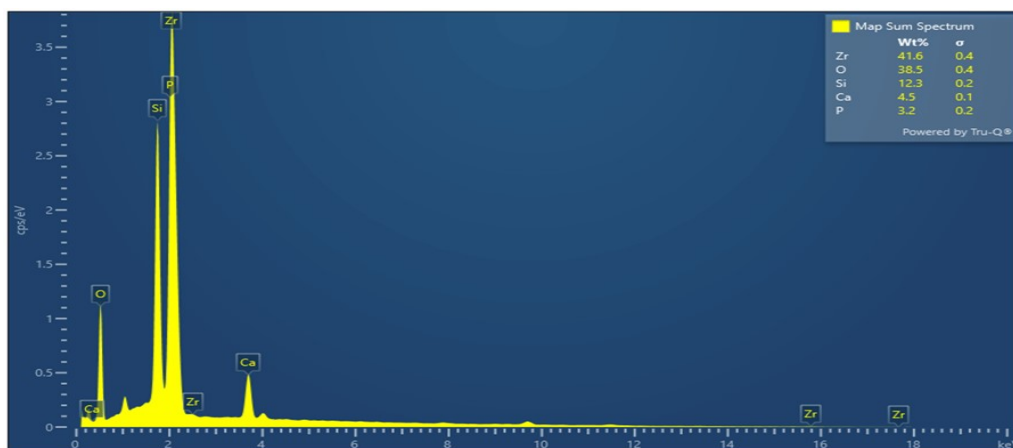

Figure. S1a

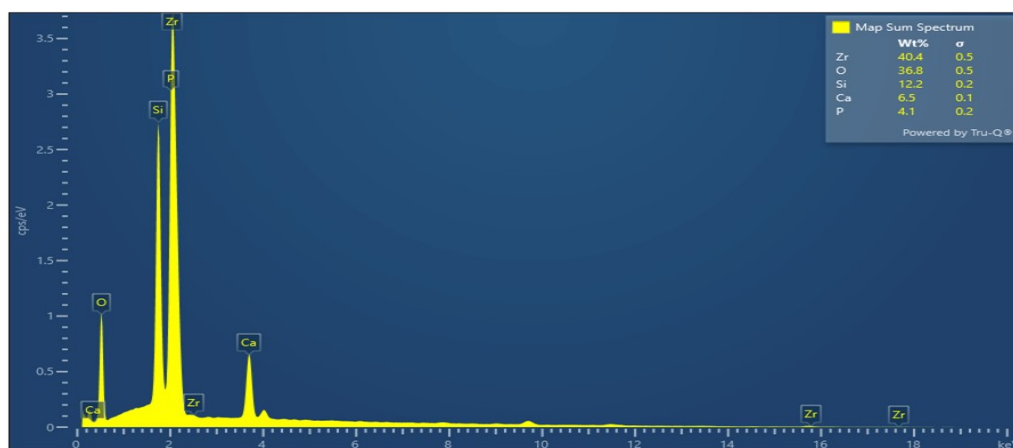

Figure. S1b

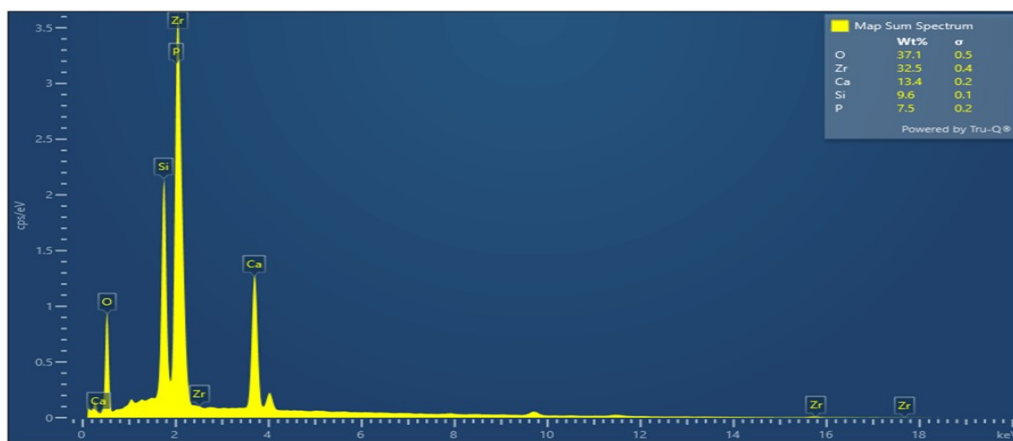

Figure. S1c

Figure S1: EDX spectra of 10CPZS (Fig. S1a), 20CPZS (Fig. S1b) and 50CPZS (Fig. S1c) specimens sintered at 1400 °C
